# Supplementary material
Source: HighWire-hosted journal article supplement (http://cmajopen.ca/highwire/filestream/80907/field_highwire_adjunct_files/1/open-2015-0005-1-at.pdf)
Supplement: open-2015-0005-1-at.pdf [file open-2015-0005-1-at.pdf]

**Appendix 1** (as supplied by the authors): List of palliative care fee codes used to create the algorithm [CORRECTED VERSION]

**Final codes included in the algorithm:**

A901 GP/FP house call (billed with B997 or B998)  
A902 Pronouncement of death in home (billed with B997 or B998)  
A945 GP/FP special palliative care consultation  
B966 Travel premium-palliative care home visit  
B990 Special visit to patient's home, weekday/daytime  
B992 Special visit to patient's home, weekday/daytime, sacrifice office hours  
B994 Special visit to patient's home, non-elective, evening hours  
B996 Special visit to patient's home, night time (first patient)  
B997 Special visit to patient's home, palliative care, days, evenings (from 2009)  
B998 Special visit to patient's home, palliative care, days, evenings (from 2005)  
C882 GP/FP terminal care in hospital  
C982 Palliative care, hospital in patient  
C945 Special palliative care consultation, hospital in patient  
E083 Subsequent visit as most responsible physician (billed with C882 or C982 or C945)  
K015 Counseling a relative on behalf of a patient  
K023 Palliative care support to individual, 30 min  
K700 Palliative Care Out-patient Case Conference  
W872 Terminal care in nursing home, GP/FP practice  
W882 Terminal care in chronic care hospital, GP/FP  
G511 Telephone management of palliative care at home  
G512 Weekly palliative care case management

**Fee codes considered, but excluded because there was no billing activity:**

K001 Detention fee  
W972 Palliative care  
W982 Palliative care  
Z361 Insertion of indwelling catheter  
Z362 Removal of indwelling catheter  
G063 Initiation of outpatient continuous nerve block infusion  
G064 Management and supervision of outpatient continuous nerve block infusion
